## RESEARCH ARTICLE

# Oocyte polarity requires a Bucky ball-dependent feedback amplification loop

Amanda E. Heim<sup>1</sup>, Odelya Hartung<sup>1</sup>, Sophie Rothhämel<sup>1,\*</sup>, Elodie Ferreira<sup>1</sup>, Andreas Jenny<sup>1,2</sup> and Florence L. Marlow<sup>1,3,†</sup>

## ABSTRACT

In vertebrates, the first asymmetries are established along the animal-vegetal axis during oogenesis, but the underlying molecular mechanisms are poorly understood. Bucky ball (Buc) was identified in zebrafish as a novel vertebrate-specific regulator of oocyte polarity, acting through unknown molecular interactions. Here we show that endogenous Buc protein localizes to the Balbiani body, a conserved, asymmetric structure in oocytes that requires Buc for its formation. Asymmetric distribution of Buc in oocytes precedes Balbiani body formation, defining Buc as the earliest marker of oocyte polarity in zebrafish. Through a transgenic strategy, we determined that excess Buc disrupts polarity and results in supernumerary Balbiani bodies in a 3'UTR-dependent manner, and we identified roles for the *buc* introns in regulating Buc activity. Analyses of mosaic ovaries indicate that oocyte pattern determines the number of animal pole-specific micropylar cells that are associated with an egg via a close-range signal or direct cell contact. We demonstrate interactions between Buc protein and *buc* mRNA with two conserved RNA-binding proteins (RNABps) that are localized to the Balbiani body: RNA binding protein with multiple splice isoforms 2 (Rbpms2) and Deleted in azoospermia-like (Dazl). Buc protein and *buc* mRNA interact with Rbpms2; *buc* and *dazl* mRNAs interact with Dazl protein. Cumulatively, these studies indicate that oocyte polarization depends on tight regulation of *buc*: Buc establishes oocyte polarity through interactions with RNABps, initiating a feedback amplification mechanism in which Buc protein recruits RNABps that in turn recruit *buc* and other RNAs to the Balbiani body.

**KEY WORDS:** Bucky ball, Oocyte polarity, Balbiani body, Rbpms2

## INTRODUCTION

The vertebrate animal-vegetal axis is established during oogenesis, whereas the anteroposterior and dorsoventral embryonic axes arise after fertilization. Oocyte polarity is a prerequisite for determining the prospective embryonic axes and germ cell determination in some non-mammalian vertebrates. Oocyte polarity can be first distinguished histologically by the asymmetric distribution of organelles, proteins and mRNAs within the Balbiani body (Bb) (de Smedt et al., 2000; Kloc et al., 2004; Marlow, 2010; Pepling et al.,

2007). The Bb is an evolutionarily conserved asymmetric structure that is present in early oocytes of all animals examined, including humans. The Bb is a transient structure assembled in primary oocytes and disassembled thereafter. In zebrafish and *Xenopus* the Bb is the first indicator of the vegetal pole. The relationship between the Bb and the animal-vegetal axis of mammalian oocytes is not known. Despite its conserved structure and status as the first asymmetric structure in oocytes, only one gene, *bucky ball* (*buc*), is known to be required for Bb assembly in vertebrates (Bontems et al., 2009; Dosch et al., 2004; Kloc et al., 2004; Marlow, 2010; Marlow and Mullins, 2008). In zebrafish oocytes, Bb assembly in primary oocytes [stage Ia (zygotene), Ib (diplotene of meiosis I)] requires Buc (Bontems et al., 2009; Marlow and Mullins, 2008) and its disassembly in stage II oocytes requires Magellan (Mgn; Macf1 – ZFIN), a microtubule-actin crosslinking factor (Gupta et al., 2010). Proper regulation of Bb development is essential to establish the animal-vegetal axis and deliver RNAs and proteins to the vegetal pole. Three pathways that localize RNAs are known in vertebrate oocytes: transit through the Bb pathway, utilization of the 'late vegetal pathway', and an animal pole transport pathway (Abrams and Mullins, 2009; Gagnon and Mowry, 2011; Kloc et al., 2001; Kloc and Etkin, 1995; Kloc and Etkin, 2005; Kloc et al., 1998; Marlow, 2010; Zhou and King, 2004). Mutations that ablate the Bb (*buc*) (Bontems et al., 2009; Marlow and Mullins, 2008) or block its disassembly (*mgn*) (Gupta et al., 2010) disrupt localization of mRNAs along the animal-vegetal axis. The resulting eggs lack animal-vegetal polarity (Bontems et al., 2009; Marlow and Mullins, 2008). In zebrafish, asymmetry is also evident in the fates of the somatic follicle cells. At the animal pole of WT oocytes a single somatic cell forms the micropyle, a channel on the eggshell required for fertilization. *buc* mutant eggshells have excess micropyles, which leads to polyspermy (Marlow and Mullins, 2008).

Nonsense mutations disrupting *buc* uncovered a role for Buc protein in promoting Bb assembly, but the regulation and function of *buc* during Bb assembly are not understood. Although Buc protein lacks identifiable functional domains, the dynamic localization of *buc* gene products in the Bb and later at the animal pole cortex (Bontems et al., 2009) suggests that localizing *buc* mRNA might be an important aspect of Buc regulation. Transcripts of the *Xenopus* homolog of the *buc* gene, *Xvelo*, localize to the oocyte vegetal pole and the relevant *cis*-acting elements in the *Xvelo* 3'UTR are known (Claussen and Pieler, 2004; Mowry and Melton, 1992). *buc* mRNA is not properly localized in *buc* mutants (Bontems et al., 2009; Marlow and Mullins, 2008), but it is not known if defective *buc* mRNA localization reflects a direct role of Buc protein in localizing its transcript or an indirect effect due to absence of the Bb and oocyte polarity.

RNA-binding proteins (RNABps), which can localize RNAs and regulate their spatial and temporal translation or stability, are attractive candidate regulators of *buc* localization and/or Buc protein

<sup>1</sup>Department of Developmental and Molecular Biology, Albert Einstein College of Medicine, 1300 Morris Park Avenue, Bronx, NY 10461, USA. <sup>2</sup>Department of Genetics, Albert Einstein College of Medicine, 1300 Morris Park Avenue, Bronx, NY 10461, USA. <sup>3</sup>Dominick P. Purpura Department of Neuroscience, Albert Einstein College of Medicine, 1300 Morris Park Avenue, Bronx, NY 10461, USA.

\*Present address: Deutsches Zentrum für Neurodegenerative Erkrankungen (DZNE) – München Adolf Butenandt-Institute of Biochemistry Ludwig-Maximilians University Munich, Schillerstrasse 44, 80336 Munich, Germany.

†Author for correspondence (florence.marlow@einstein.yu.edu)

Received 6 October 2012; Accepted 2 December 2013

activity. Indeed, several RNAbps, or their RNAs, localize to the Bbs of zebrafish and frogs (Draper et al., 2007; Kloc et al., 2000; Kosaka et al., 2007; Kroll et al., 2002; Marlow and Mullins, 2008; Song et al., 2007; Zhao et al., 2001). Deleted in azoospermia-like (*Dazl*) is a conserved RNAbp required for germ cell differentiation and survival (Hashimoto et al., 2004; Houston and King, 2000; Houston et al., 1998; McNeilly et al., 2000; Ruggiu et al., 1997; Saunders et al., 2003). In *Xenopus* and zebrafish, *dazl* transcripts localize to the Bb and later remain at the vegetal pole (Bontems et al., 2009; Chang et al., 2004; Kloc et al., 2001; Kosaka et al., 2007; Maegawa et al., 1999; Marlow and Mullins, 2008).

Like *Dazl*, RNA binding protein with multiple splice isoforms 2 (Rbpms2; also known as Hermes) is a conserved Bb-localized RNAbp (Kosaka et al., 2007; Song et al., 2007; Zearfoss et al., 2004). Rbpms2 colocalizes with and binds germ plasm RNAs (Kosaka et al., 2007; Song et al., 2007) and has been postulated to maintain their translational repression. Rbpms2 and *dazl* are not localized in zebrafish *buc* mutants (Bontems et al., 2009; Marlow and Mullins, 2008; Nojima et al., 2010). However, it has not been determined whether Buc specifies the site of Bb assembly or participates in recruiting proteins and RNAs to the Bb via indirect or direct interaction.

Here we show that endogenous Buc protein is asymmetrically localized in oocytes at stages before formation of the Bb, where Buc later localizes; thus, Buc is the earliest marker of oocyte polarity in zebrafish. Using a transgenic approach, we found that the *buc* introns are required for full rescue of the egg polarity and axis defects of *buc*<sup>p106/p106</sup> mutant females. As with other localized mRNAs, the *buc* 3'UTR harbors predicted recognition sites for RNAbps. Transgenes encoding the full-length protein and 3'UTR without introns (*cbuc*) cause ectopic Bb formation, whereas intron-lacking versions of *buc* with a truncated 3'UTR (*cbuc80*) disrupt animal-vegetal polarity. We show that Rbpms2 binds to *buc* but not other Bb-localized RNAs, such as *dazl*. By contrast, *Dazl* binds *buc* and *dazl* RNAs. Because Buc appears asymmetrically localized prior to localization of its RNA, we postulate that a mechanism involving localized translation or stabilization of Buc generates asymmetry and allows recruitment of mRNAs via interactions between Buc and RNAbps, such as Rbpms2. Our results indicate that establishing oocyte polarity in zebrafish relies on precise regulation of Buc levels and activity, possibly by a mechanism that requires *buc* introns. Our findings suggest that Buc initiates a positive-feedback mechanism whereby local production and/or stabilization of Buc protein allows recruitment of more *buc* RNA and, in turn, production of more Buc protein.

## RESULTS

### Asymmetric localization of Buc protein prior to Bb formation

To determine when and where endogenous Buc protein first appears during oocyte development, we generated anti-Buc antibodies. Endogenous Buc protein localized to the Bb in wild-type (WT) primary oocytes (Fig. 1A,A',C-F; data not shown); no localized Buc protein was detected in *buc*<sup>p106/p106</sup> mutant oocytes (Fig. 1B,B') or when primary antibody was omitted (not shown). Bb localization is consistent with the essential function of Buc in forming this asymmetric oocyte structure. To investigate whether asymmetric Buc protein might precede Bb formation and provide an early marker of oocyte asymmetry, we examined earlier stages of oogenesis. We detected asymmetrically enriched perinuclear Buc protein at pre-Bb stages (Fig. 1G,G'), indicating that Buc protein and zebrafish oocytes are polarized before Bbs are detectable.

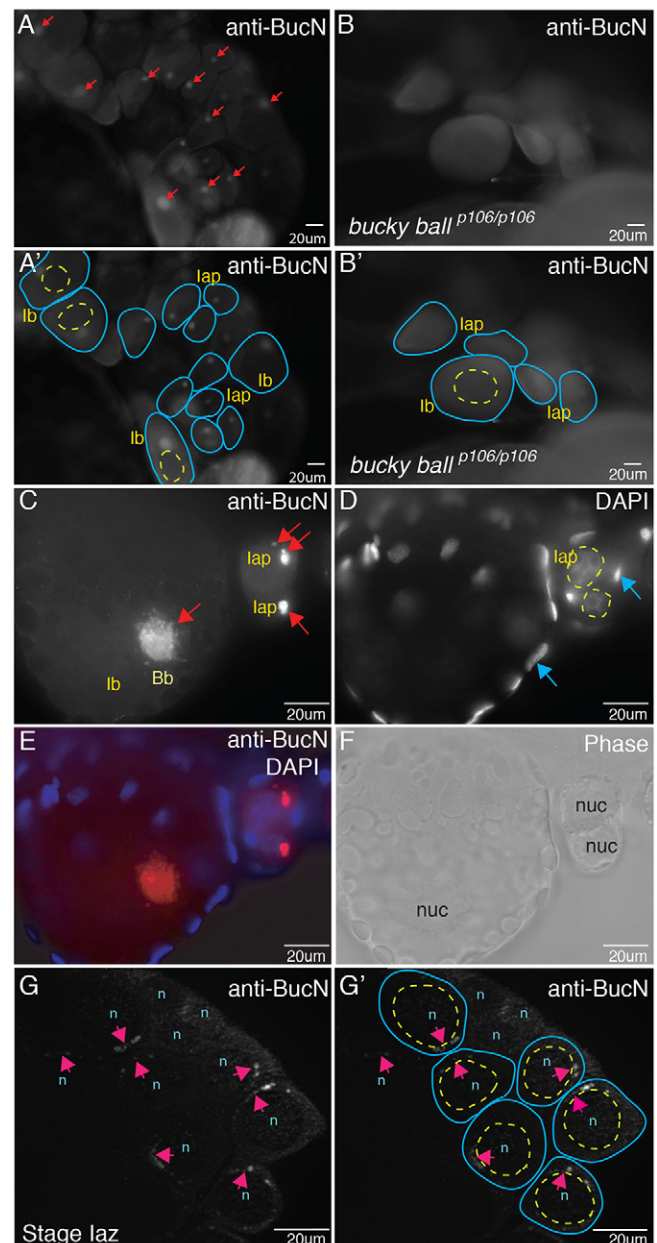

**Fig. 1. Buc protein localizes to Balbiani bodies (Bbs) and is asymmetric before Bb formation.** (A,A',C) Buc protein localization in Bbs (red arrows in A,C) of stage laz (zygotene), lap (pachytene) and lb (larger than la, arrested in diplotene) WT oocytes in whole-mount ovaries stained with anti-Buc antibodies. Buc protein is not detected in *buc*<sup>p106/p106</sup> mutants (B,B'). (A',B') Tracings of the oocytes (blue lines) and their nuclei (yellow dashed lines) from A and B. (D) DAPI-labeled nuclei of oocytes (yellow dashed circles) and follicle cells (blue arrows). (E) Merge of C and D. (F) Corresponding phase image to E. (G) Perinuclear localization of Buc (pink arrows) in WT stage lap oocytes before Bb formation. (G') Tracing of oocytes (blue lines) and nuclei (yellow lines). n/nuc, nucleus.

### Intron-containing *buc* transgenes rescue egg polarity phenotypes of *buc* mutants

Zebrafish maternal-effect mutants revealed that Buc protein is essential for Bb formation, localization of *buc* and other Bb mRNAs, and animal-vegetal (AnVg) axis formation (Bontems et al., 2009; Dosch et al., 2004; Marlow and Mullins, 2008; Nojima et al., 2010). To analyze the regulation and function of *buc*, we identified



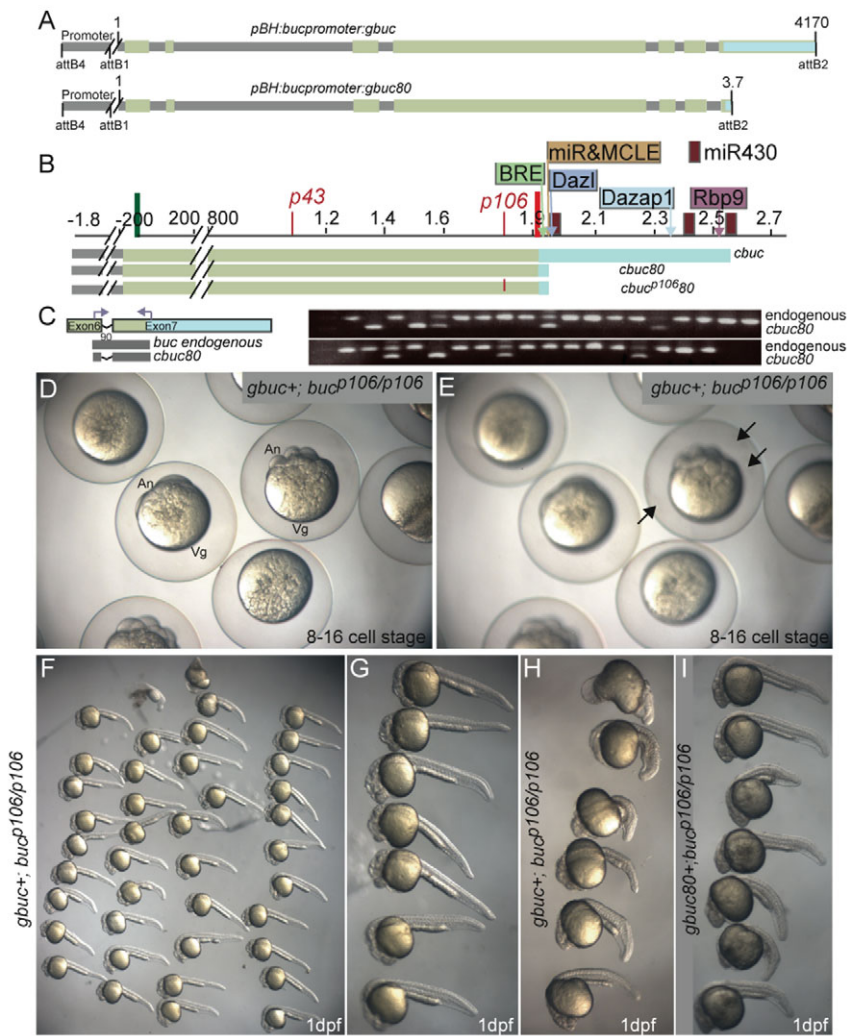

**Fig. 2. *buc* transgenes with introns rescue *buc* egg polarity phenotypes.** (A,B) *buc* gene structure and the constructs used herein. (A) The *buc* promoter was used to express full-length *buc* or *buc* with a truncated 3'UTR. (B) The full-length *buc* ORF containing the full 3'UTR (*cbuc*) or a truncated *buc* 3'UTR (*cbuc80*) without introns: grey, non-coding/intron; green, exon; light blue, 3'UTR. In addition, a mutant Buc protein with the *buc*<sup>p106</sup> nonsense mutation was generated (*cbucp10680*). (C) Schematic and genotyping assay. Products from genomic DNA are 90 bp smaller in transgenes lacking introns. Gel images of products from adult F1 progeny of *cbuc80* founders. (D,E) 8- to 16-cell stage F2 progeny of a *gbc* rescued mutant in different focal planes. Arrows in E indicate the excess micropyles on embryos with rescued egg polarity. (F) Clutch of *gbc* rescued mutant female at 1 dpf. (G) Higher magnification of embryos from F. (H) Ventralized phenotypes of *gbc*<sup>+</sup> mutant females. (I) Rescued progeny of a *gbc80 buc* mutant founder. (F-I) Rostral is left and caudal is right. (D-H) Progeny of F1 transgenic mothers. An, animal; Vg, vegetal.

*buc* promoter sequences that recapitulate *buc* expression (supplementary material Fig. S1A,B) and determined that transgenic reporters under control of the *buc* promoter are expressed in early oocytes (supplementary material Fig. S1C-E).

We cloned a minigene including all introns (*gbc*) and verified that RNA from the transgene was properly spliced by RT-PCR, sequence analysis and expression assays at stages when endogenous *buc* transcripts were not detectable (supplementary material Fig. S2).

To facilitate rescue and structure-function analysis in *buc* mutants, we generated transgenic lines expressing *gbc* and various mutant derivatives in *buc* heterozygotes (Fig. 2A-C). Only the *gbc* transgene rescued AnVg egg polarity and micropylar numbers in progeny of *buc*<sup>p106/p106</sup> mutants (Table 1, Fig. 2D-I). Some embryos with rescued egg polarity had multiple micropyles (two to four on one side), indicating incomplete rescue (Fig. 2E). Sixty-three percent of rescued progeny were viable at 1 dpf and 92% of those showed

**Table 1. Phenotypes of eggs of *buc* transgenic females**

| Genotype                                                                 | No AnVg polarity, multiple micropyles | WT polarity, one micropyle | WT polarity, multiple micropyles | Total |
|--------------------------------------------------------------------------|---------------------------------------|----------------------------|----------------------------------|-------|
| <i>Tg[pBH:bucpromoter:gbc]<sup>+</sup>; buc<sup>p106/+</sup></i> F0-17   | 597 (30.2)                            | 1371 (69.4)                | 8 (0.4)                          | 1976  |
| <i>Tg[pBH:bucpromoter:gbc]<sup>+</sup>; buc<sup>p106/+</sup></i> F0-25   | 310 (35)                              | 583 (65)                   | 0 (0)                            | 893   |
| <i>Tg[pBH:bucpromoter:gbc]<sup>+</sup>; buc<sup>p106/+</sup></i> F1-3    | 12 (8.5)                              | 105 (73.9)                 | 25 (17.6)                        | 142   |
| <i>Tg[pBH:bucpromoter:gbc]<sup>+</sup>; buc<sup>p106/+</sup></i> F1-4    | 0 (0)                                 | 60 (100)                   | 0 (0)                            | 60    |
| <i>Tg[pBH:bucpromoter:gbc]<sup>+</sup>; buc<sup>p106/+</sup></i> F1-5    | 0 (0)                                 | 27 (100)                   | 0 (0)                            | 27    |
| <i>Tg[pBH:bucpromoter:gbc]<sup>+</sup>; buc<sup>p106/p106</sup></i> F1-1 | 2 (1.5)                               | 129 (96.3)                 | 3 (2.2)                          | 134   |
| <i>Tg[pBH:bucpromoter:gbc]<sup>+</sup>; buc<sup>p106/p106</sup></i> F1-2 | 6 (6)                                 | 72 (68)                    | 28 (26)                          | 106   |
| <i>Tg[pBH:bucpromoter:gbc]<sup>+</sup>; buc<sup>p106/p106</sup></i> F1-6 | 0 (0)                                 | 43 (100)                   | 0 (0)                            | 43    |
| <i>Tg[pBH:bucpromoter:gbc80]<sup>+</sup>; buc<sup>p106/p106</sup></i> F0 | 448 (77)                              | 99 (17)                    | 34 (6)                           | 581   |
| <i>Tg[bucpromoter:cbuc80]<sup>+</sup>; buc<sup>p106/+</sup></i> F0       | 67 (15)                               | 389 (85)                   | 0 (0)                            | 456   |
| <i>Tg[bucpromoter:cbuc80]<sup>+</sup>; buc<sup>p106/+</sup></i> F0       | 4 (15)                                | 23 (85)                    | 0 (0)                            | 27    |
| <i>Tg[bucpromoter:cbuc80]<sup>+</sup>; buc<sup>p106/+</sup></i> F0       | 329 (39)                              | 523 (61)                   | 0 (0)                            | 852   |

The percentage is shown in parentheses.

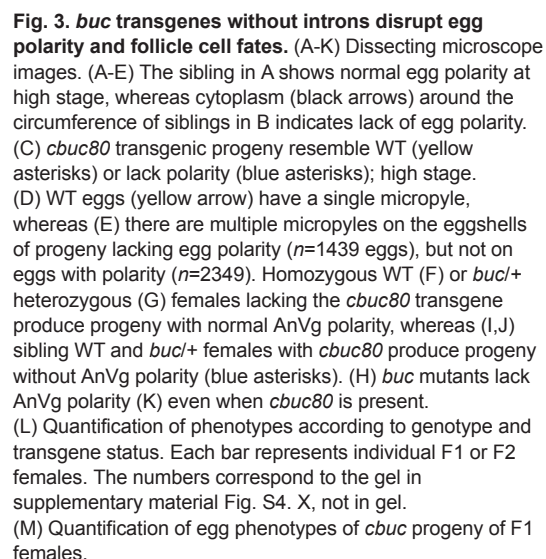

We conducted histological examination of the *cbuc* transgenic ovaries to assess oocyte polarity. Morphologically, females expressing transgenes lacking introns were normal and their ovaries



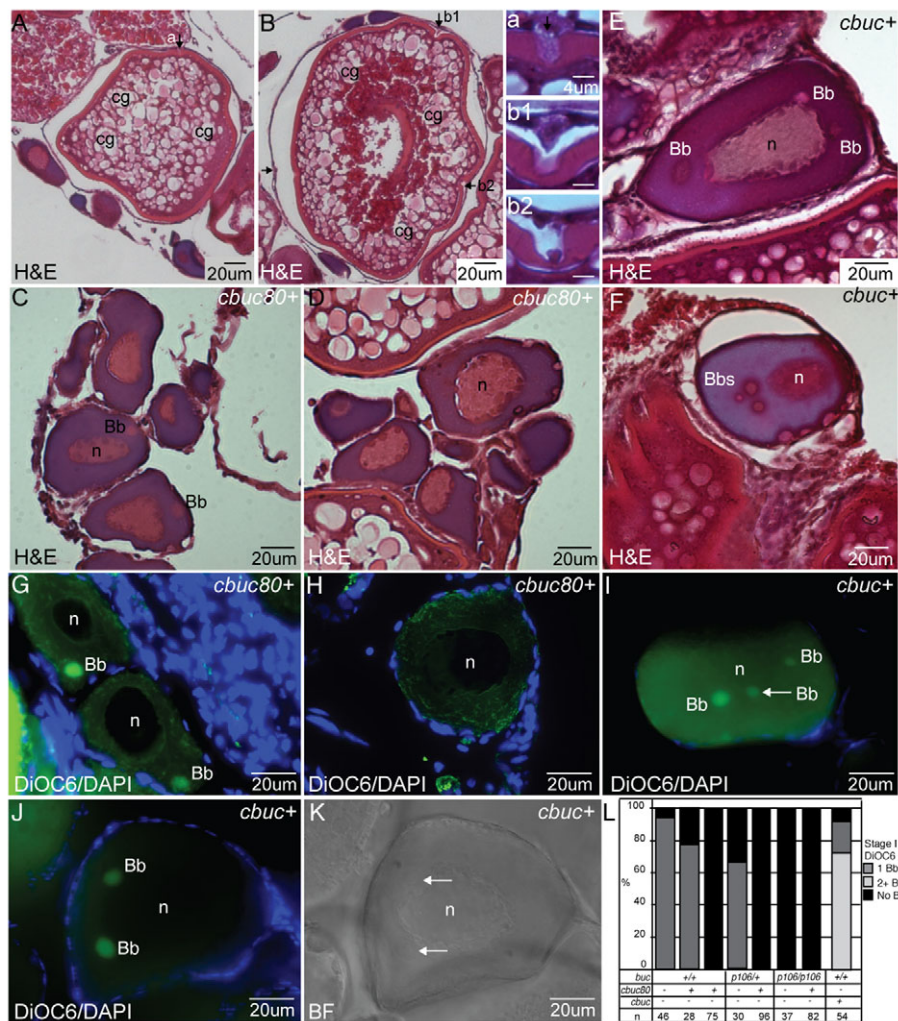

**Fig. 4. Defective Bb formation and excess polarized somatic fates in transgenics lacking introns.** (A–D) Oocytes from *cbuc80* transgenic founders. (A–F) Hematoxylin and Eosin (H&E)-stained F0 ovary sections reveal a normal composition of oocytes, including (A) stage III oocytes with single micropylar cells (arrow and a1), (B) stage III oocytes with multiple micropylar cells (arrows and b1 and b2), (C) stage I oocytes with Bbs and (D) stage I oocytes lacking Bbs. (E,F) Ectopic Bbs of *cbuc+* F1 females. (G–J) DiOC6 staining of sectioned ovaries. *cbuc80* F1 ovaries reveal primary oocytes with (G) and without (H) Bbs. (I,J) Ectopic Bbs of *cbuc+* F1 females. (K) BF view of oocyte in J. Arrows indicate Bbs. (L) Quantification of Bbs from different individual F1 transgenic females labeled with DiOC6. Cg, cortical granules; n, nucleus.

were composed of oocytes of all stages. As predicted based on their eggs, cortical granule distribution and yolk accumulation in advanced stage oocytes were normal (Fig. 4A,B). However, consistent with the excess micropyles of eggs with defective polarity, we observed two populations of advanced stage oocytes, those with one somatic micropylar cell positioned at the animal pole (Fig. 4Aa) and those with multiple micropylar cells (Fig. 4Bb1,b2). The micropyle and egg polarity phenotypes were coincident in females expressing *cbuc* and *cbuc80*. No Buc protein expression was detected in the follicle cell layer of *buc*<sup>p106/+</sup> females negative or positive for *cbuc* transgenes (supplementary material Fig. S5). Furthermore, the *Tg[buc:mApple]* promoter reporter showed mApple fluorescence only in oocytes (supplementary material Fig. S1C–E'''). These results indicate that *buc* in the germline can non-autonomously influence the otherwise ‘wild-type’ somatic cells, either by changing their fate or permitting survival of micropyle progenitors. Because the two classes of oocytes are intermixed within the same ovary in *cbuc* and *cbuc80* transgenics, the oocyte signals that regulate micropyle numbers apparently act at short range, such that one oocyte does not affect the micropylar cells associated with neighboring oocytes.

#### Dominant phenotypes of *buc* transgenes

To further investigate whether *cbuc* transgenes disrupt Bb development like *buc* mutants, we examined mitochondria and

endoplasmic reticulum (ER) in oocytes of *cbuc* transgenic females. We observed three categories of stage Ib oocytes in WT females expressing *cbuc*: normal, supernumerary Bbs, and those lacking Bbs (Fig. 4E,F). Moreover, mitochondria and ER were detected in the Bbs and excess Bbs of stage Ib oocytes (Fig. 4G–L) or were broadly distributed (Fig. 4H; supplementary material Fig. S6), as in *buc* mutants. By contrast, no ectopic Bbs were detected in *cbuc80* females (Fig. 4C,D). Together, these data indicate that excess Buc disrupts polarity and, in a 3'UTR-dependent manner, causes supernumerary Bbs.

#### *buc* transgenes disrupt the localization of *buc* and other Bb mRNAs

To determine whether transgenes lacking introns prevented expression of endogenous *buc*, we used a qRT-PCR approach to distinguish endogenous *buc* from transgenic transcripts. As anticipated, both endogenous and *cbuc80* transcripts were present in transgenic ovaries and their progeny and transgene expression correlated with the penetrance of egg polarity phenotypes (Fig. 5A). In the most strongly affected *cbuc* ovaries, both transcripts were reduced (Fig. 5A).

The *cbuc80* construct contained only the first 80 bp of the 3'UTR (Fig. 2B). This truncated 3'UTR retained predicted miR-302/371-373/miR430 sites and lacked putative regulatory or protective RNAbp sites (Fig. 2B). To determine if *cbuc* transgenes affect RNA

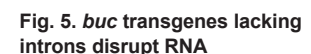

To functionally assess whether ectopic Buc protein or its mRNA disrupted polarity, we analyzed females with an analogous transgene containing the *buc<sup>p106</sup>* nonsense mutant allele (*cbucp10680*) (Fig. 2B, Table 2). Significantly, this nonsense mutation does not cause phenotypes in *buc<sup>p106/+</sup>* heterozygotes (Bontems et al., 2009; Marlow and Mullins, 2008). In contrast to females expressing *cbuc80*, *cbucp10680* F0 and F1 transgenic females produced only progeny with normal egg polarity and single micropyles (Table 2).



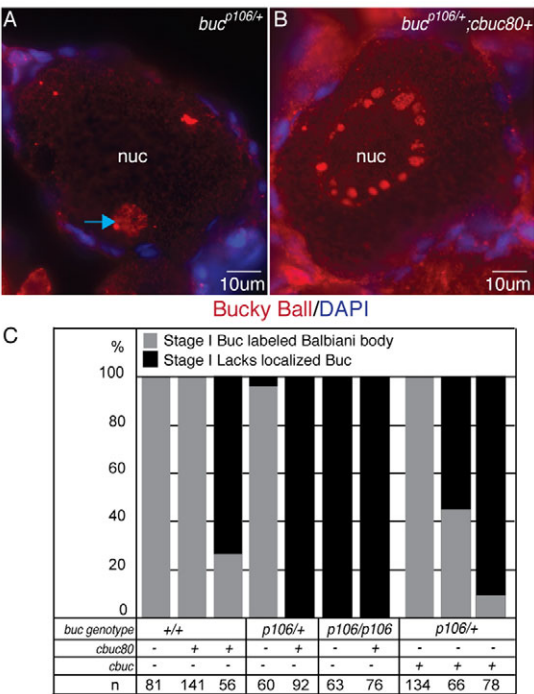

**Fig. 6. Antimorphic activity of *buc* transgenes lacking introns requires functional protein and disrupts endogenous Buc.** (A,B) Sectioned and stained oocytes. Buc protein localizes to the Bb (blue arrow) of (A) *buc<sup>p106/+</sup>;cbuc80*– stage Ib oocytes, and is not asymmetric in (B) *buc<sup>p106/+</sup>;cbuc80+* stage Ib oocytes. (C) Quantification of Bbs of Buc-labeled oocytes of F1 or F2 females. *n*, the number of oocytes examined.

As for *cbuc80*, we analyzed *cbucp10680* transcripts and found that its RNA was expressed at a comparable level (Fig. 5A). By contrast, *buc<sup>p106/+</sup>* heterozygous transgenic females generated from crosses of two *cbucp10680* transgenic F1s produced progeny lacking AnVg polarity (26%; *n*=1183 eggs, 13 females), whereas their *buc<sup>+/+</sup>* sibling transgenic females infrequently produced progeny lacking egg polarity (2%; *n*=1021 eggs, 13 females). This indicates that higher copy numbers of *cbucp10680* can disrupt AnVg polarity. Taken together, these data indicate that the dominant polarity phenotypes of *cbuc80* were due to a functional coding sequence for Buc protein in the transgene.

**Buc protein interacts with conserved germ plasm-associated RNAbps**

Previous studies have shown that *buc* mRNA localizes to the Bb and an exogenous GFP-Buc fusion expressed from RNA injected into oocytes accumulates in the Bb (Bontems et al., 2009). Here we show that endogenous Buc protein localizes to the Bb (Fig. 1) via a mechanism that is likely to involve local production or stabilization of Buc protein, because endogenous *buc* transcripts are not asymmetric before Bb formation or in *buc* mutants (Bontems et al., 2009). The lack of Bbs in *buc* mutants demonstrates that Buc is required to assemble this conserved aggregate of RNAs and proteins, but the mechanism of Buc action is not known. One potential mechanism is that Buc mediates Bb assembly and RNA localization by interacting with RNAbps. Rbpms2 is a conserved RNAbp that contains two RNA recognition motif (RRM) domains (Gerber et al., 1999; Kosaka et al., 2007; Song et al., 2007; Zearfoss et al., 2004). Rbpms2 protein localizes to the Bbs of oocytes in

**Table 2. Egg phenotype analysis indicates that *cbuc<sup>p106/+</sup>* F0 and F1 females produce normal eggs**

|                                                     | No AnVg polarity | WT polarity | Total |
|-----------------------------------------------------|------------------|-------------|-------|
| Founder females                                     |                  |             |       |
| FO <i>buc<sup>p106/+</sup>;Tg[buc:cbucp10680]</i> + | 0                | 266         | 266   |
| FO <i>buc<sup>p106/+</sup>;Tg[buc:cbucp10680]</i> + | 0                | 164         | 164   |
| FO <i>buc<sup>p106/+</sup>;Tg[buc:cbucp10680]</i> + | 0                | 191         | 191   |
| FO <i>buc<sup>p106/+</sup>;Tg[buc:cbucp10680]</i> + | 0                | 97          | 97    |
| F1 adult females                                    |                  |             |       |
| F1 <i>buc<sup>+/+</sup>;Tg[buc:cbucp10680]</i> +    | 0                | 388         | 388   |
| F1 <i>buc<sup>+/+</sup>;Tg[buc:cbucp10680]</i> +    | 0                | 390         | 390   |
| F1 <i>buc<sup>p106/+</sup>;Tg[buc:cbucp10680]</i> + | 0                | 116         | 116   |
| F1 <i>buc<sup>p106/+</sup>;Tg[buc:cbucp10680]</i> + | 0                | 49          | 49    |
| F1 <i>buc<sup>p106/+</sup>;Tg[buc:cbucp10680]</i> + | 0                | 39          | 39    |

zebrafish (Kosaka et al., 2007; Marlow and Mullins, 2008) and frogs (Zearfoss et al., 2004) and is not localized in *buc* mutants (Marlow and Mullins, 2008). Based on their localization, we hypothesized that Buc might bind to Rbpms2, which could then, via its RNA-binding motifs, recruit or retain other Bb RNAs (such as *buc* mRNA). To test this possibility, we performed yeast two-hybrid (Y2H) experiments. Indeed, full-length Buc (Buc-F1) interacted with zebrafish and human Rbpms2, but not with another RNAbp, DAZ associated protein 1 (Dazap1) (Fig. 7A,B; data not shown) (Claussen and Pieler, 2004; Kurihara et al., 2004).

To confirm the interaction observed in yeast, we transfected HEK293 cells with GFP-Buc or YFP-Diego, an unrelated bait, and Myc-Rbpms2 or Myc-Dishevelled as a control, and conducted co-immunoprecipitation (co-IP) experiments on the HEK293 cell lysates using anti-GFP antibody. We found that Rbpms2 co-immunoprecipitated with GFP-Buc, but not YFP-Diego (Fig. 7C). To independently assess binding, we conducted *in vitro* GST pull-down assays. We found that GST-Buc fusion protein interacted with <sup>35</sup>S-labeled Rbpms2 (Fig. 7D). These approaches validated the interaction between Buc and Rbpms2 that we observed in the Y2H assay and indicate that Buc is likely to directly bind to Rbpms2.

We used the binding interaction between Buc and Rbpms2 to identify potential functional domains of the Buc protein. Using the Y2H assay, we mapped the Rbpms2 binding site using six partially overlapping Buc truncations covering the full protein (Fig. 7A,B; data not shown). Two truncations were N-terminal Buc deletions (BucΔ1-252 and BucΔ1-386), two carried nonsense mutations corresponding to the *buc<sup>p43</sup>* and *buc<sup>p106</sup>* mutant alleles (Bontems et al., 2009), and two harbored internal deletions [BucΔ53-116 frame shift (fs) and BucΔ353-599]. BucΔ1-252 and BucΔ1-386 did not interact with Rbpms2, but the *Buc<sup>p43</sup>* and *Buc<sup>p106</sup>* mutant proteins did. The internal deletions displayed an intermediate binding phenotype in the Y2H assays. Together, these data indicate that the Buc N-terminus mediates binding to Rbpms2 and that the internal region of the protein either augments or stabilizes this interaction. Rbpms2 has been previously reported to interact with germ plasm components in *Xenopus* (Song et al., 2007). Colocalization of Buc and Rbpms2 in the Bb along with germ plasm RNAs and the interaction between Buc and Rbpms2 suggest a mechanism whereby Buc interaction with Rbpms2 could recruit *buc* and other Bb RNAs.

**Two Bb-localized RNAbps, Dazl and Rbpms2, bind *buc* RNA**

Colocalization of Buc and Rbpms2 in the Bb along with germ plasm RNAs and the direct interaction between Buc and Rbpms2 suggest a mechanism whereby Buc interaction with Rbpms2 recruits RNAs to the Bb. To explore this hypothesis, we investigated whether Rbpms2

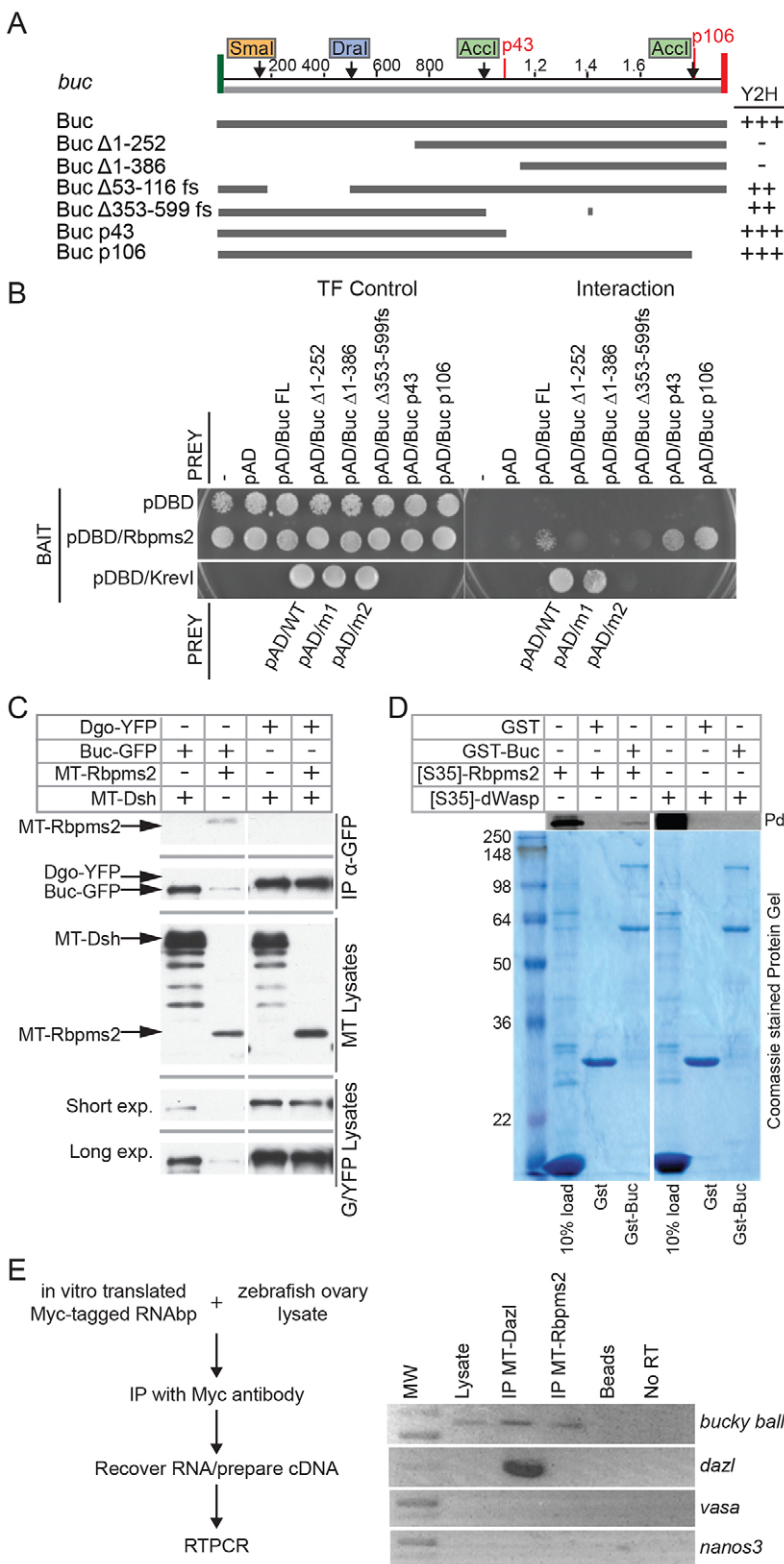

**Fig. 7. Buc protein interacts with the RNAbp Rbpms2.** (A) Summary of *buc* deletion constructs used in the yeast two-hybrid analyses in B. Buc interacts with Rbpms2 via the N-terminus of Buc. The transformation (TF) control plates select for bait (pDBD) and prey (pAD) plasmids, whereas the interaction plates select for binding between the bait and prey proteins. Control baits and preys were Krev1 and a strongly interacting prey Ral/GDS (wt) and two mutants: Ral/GDSm1 (moderate/medium interaction with Krev) and Ral/GDSm2 (weak/no interaction with Krev). (C) Rbpms2 co-immunoprecipitates with Buc in HEK293 lysates. Top panels indicate transfected plasmids. Long exposure reveals proteins with lower expression levels. (D) Pull-down assay with GST- and <sup>35</sup>S-labeled GFP fusion proteins. (pd, pull down). GST fusion protein inputs were visualized with Coomassie Blue. (E) RNA IP experiments using *in vitro* synthesized Myc-tagged RNAbps. The RNAs that co-immunoprecipitated with Myc-tagged RNAbps were amplified by RT-PCR. MT-Rbpms2 immunoprecipitated *buc* but not *nanos2*, *vasa* or *dazl*. MT-Dazl associated with *buc* and *dazl* mRNAs.

and another Bb RNAbp that associates with germline RNAs in primordial germ cells, Dazl (Kosaka et al., 2007; Takeda et al., 2009), bind to Bb RNAs in oocyte lysates using Myc-tagged Rbpms2 (MT-Rbpms2) and Myc-tagged Dazl (MT-Dazl) as baits (Fig. 7E). Among the ovary transcripts examined in the IP between MT-Rbpms2, we only detected *buc* (Fig. 7E). *buc* was also detected from IP with MT-Dazl. In addition to detecting *buc* in association with MT-Dazl, we

also detected *dazl*, which did not bind Rbpms2 or beads alone (Fig. 7E). These results indicate that Rbpms2 and Dazl bind to some Bb mRNAs and might mediate their recruitment to the Bb.

**DISCUSSION**  
The vertebrate AnVg axis is established during oogenesis. Oocyte polarity is a prerequisite for determining the prospective embryonic



axes and setting aside the germ cell determinants in some non-mammalian vertebrates (Abrams and Mullins, 2009; Marlow, 2010; Mir and Heasman, 2008; Schier and Talbot, 2005). The Bb is an evolutionarily conserved asymmetric structure present in early oocytes of all animals examined, including humans. Our study identifies Buc protein, an essential regulator of the AnVg axis, as the earliest marker of oocyte polarity in zebrafish. Discrete localization of endogenous Buc protein and overexpression phenotypes caused by transgenes with intact open reading frames indicate that spatial or temporal regulation of Buc translation or stabilization is essential for oocyte polarity. Interestingly, we also find a non-autonomous role of the germline in limiting somatic follicle cell fates, pointing toward communication between the germline and somatic cells. Further, we identify interactions with the RNAbps Rbpms2 and Dazl and *buc* products. Buc protein and *buc* RNA bind Rbpms2, whereas *buc* and *dazl* RNAs bind to another Bb component, Dazl. Thus, interactions with RNAbps might play key roles in regulating Buc activity and establishing oocyte polarity in zebrafish.

### Regulation of *buc* RNA is likely to generate asymmetric Buc protein localization and trigger Bb assembly

Endogenous Buc protein is localized asymmetrically before Bb assembly and later is localized to the Bb. At the stages when asymmetric perinuclear Buc protein is detected, its transcripts remain broadly distributed, indicating that local stabilization of Buc or selective translation of its mRNA, rather than global redistribution of *buc* RNA, is likely to initiate asymmetric Buc. Mechanisms to generate asymmetric protein localization include localized translation, local stabilization and aggregation, and active transport of a protein to a specific subcellular location (Gagnon and Mowry, 2011; Hachet and Ephrussi, 2001; Holt and Bullock, 2009; Kloc and Etkin, 2005; Kugler and Lasko, 2009; Minakhina and Steward, 2005; St Johnston, 2005; Zhou and King, 2004). If Buc protein were uniformly produced and then transported to a perinuclear position, we would expect to initially detect Buc protein throughout the oocyte followed by progressive enrichment adjacent to the nucleus. Our data argue against such a model, although we cannot exclude that Buc is present throughout the cell at levels below our detection. Moreover, asymmetric localization of Buc protein in WT and the loss of oocyte polarity caused by the *buc* transgenes seem more consistent with a mechanism that involves localized translation or stabilization of Buc protein. According to the localized stabilization scenario, broadly produced Buc protein would be rapidly degraded except near the nucleus where it accumulates. Alternatively, or in addition, the initially ubiquitous endogenous *buc* mRNA could be translationally repressed via association with RNAbps except near the nucleus, where a limiting or localized factor(s) would alleviate repression of *buc* RNA. Such a mechanism would explain the gain-of-function phenotypes that we observe in WT (*buc*<sup>+/+</sup>; *buc*<sup>p106/+</sup>) genotypes expressing *gbuc* and *cbuc* transgenics. This would also be consistent with the potentially dominant-negative phenotypes caused by high doses of *cbucp10680*, which might result from titration of a limiting repressor and premature translation of endogenous *buc* analogous to the mechanisms reported for *oskar* mRNAs harboring stop codons (Zimyanin et al., 2007). The identity of the protein(s) regulating *buc* translation remains to be determined. Vasa is a compelling candidate, as it is known to promote translation in the female germline of flies (Carrera et al., 2000; Lasko and Ashburner, 1988; Markussen et al., 1995; Styhler et al., 1998) and Vasa protein is perinuclear in early stage zebrafish oocytes (Knaut et al., 2000). In

WT oocytes, however, Vasa protein is not localized to the Bb in zebrafish (Knaut et al., 2000), suggesting that other, yet-to-be-identified proteins would regulate Buc translation within the Bb.

### Oocyte polarity and follicle cell fate

In WT oocytes there is a single animal pole where only one micropyle develops. In *buc* mutants, expanded or ectopic animal poles, as evidenced by multiple domains of the animal pole marker *vg1* (*igf2bp3* – ZFIN) (Marlow and Mullins, 2008), support development of excess micropylar cells, indicating that the animal pole environment might provide an instructive or permissive cue for micropylar cell survival or fate. Notably, we observed eggs with WT polarity and two to four micropyles on one half of the eggshell of some *gbuc* rescued mutant eggs. In *cbuc80* and *cbuc* transgenic eggs without polarity, we always observed supernumerary micropyles. Similarly, all eggs from *cbuc80* and *cbuc* transgenic females with normal polarity had only one micropyle. Concordance between egg polarity and micropyle phenotypes and the observation that follicle cells express no detectable Buc protein are consistent with a model whereby local oocyte signals regulate micropyle cell fate. The nature of the communication is not clear, but it is likely to involve a close-range signal, possibly direct cell contact, rather than a broadly diffusible signal, because oocytes with multiple micropyles can be adjacent to those with one micropylar cell.

### A self-organizing mechanism to recruit RNAs to the Bb

Buc protein is essential for RNA localization along the zebrafish AnVg oocyte axis, including for the earliest RNAs, which localize to the Bb near the prospective vegetal pole (Bontems et al., 2009; Marlow and Mullins, 2008; Nojima et al., 2010). Buc harbors no known RNA-binding motifs, but our analysis supports the possibility that Buc exerts its effects on RNA by serving as a scaffold and assembly factor for RNAbps. We identified a novel interaction between Buc protein and a conserved Bb-localized RNAbp Rbpms2 (Kosaka et al., 2007; Song et al., 2007). Interaction between Buc and Rbpms2 requires the N-terminus of Buc protein. Thus, our work defines a potential functional domain of Buc protein and, intriguingly, a potential mechanism by which Buc could recruit RNAs to the Bb. Our data suggest that Buc might promote oocyte polarity by interacting with RNAbps to direct the assembly of ribonucleoprotein (RNP) complexes to form the Bb (Fig. 8).

Many Bb-localized RNAs contain a mitochondrial cloud localization element (MCLE) site, which is sufficient to direct RNAs to the Bb in *Xenopus* oocytes (Kosaka et al., 2007). The *Xenopus* MCLE includes six copies of a hexamer sequence, but zebrafish *buc* RNA apparently has only one copy, as is also the case for zebrafish *nanos3* and *dazl*. Although the single hexamer sequence is present in *cbuc80*, this region is not sufficient for proper regulation and localization of *buc*. Although several RNAs, predominantly germ plasm RNAs, localize to the Bb of early oocytes, these RNAs occupy distinct cellular compartments in late stage oocytes. For example, transcripts of *nanos*, *vasa*, *buc*, *dazl* and dorsal axis regulators including *syntabulin* and *wnt8a* all localize to the Bb of stage I oocytes (Bontems et al., 2009; Draper et al., 2007; Knaut et al., 2000; Kosaka et al., 2007; Lu et al., 2011; Nojima et al., 2010), but by stage III *buc* transcripts are localized to the animal pole, *nanos* is distributed throughout the oocyte, *vasa* is circumferential at the cortex, and *dazl* and *syntabulin* remain at the vegetal pole. For many germ plasm RNAs examined in zebrafish oocytes, the 3'UTR is sufficient to achieve their proper localization (Kosaka et al., 2007).

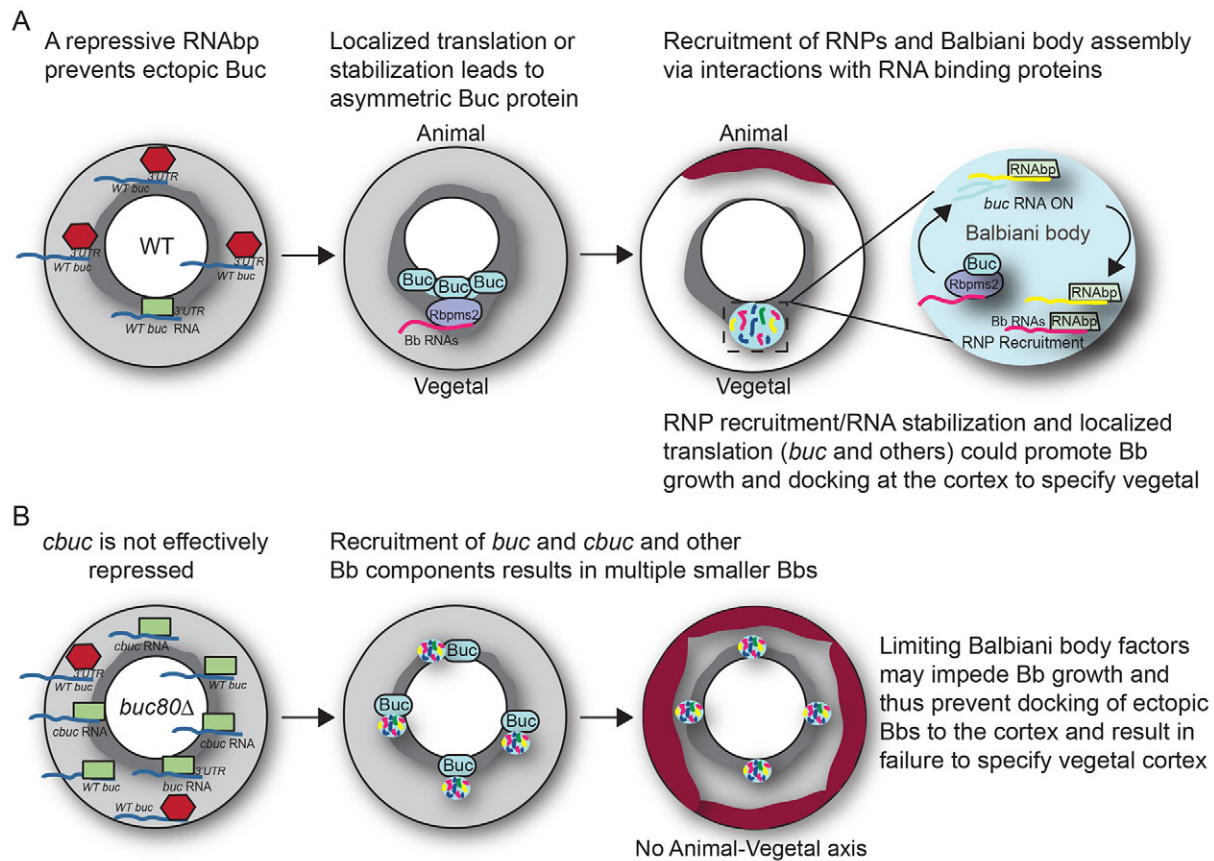

**Fig. 8. A feedback amplification model for Bb assembly.** (A) Model depicting how Buc might promote oocyte polarity and Bb formation via interactions with RNAbps. (B) Potential events in *cbuc* transgenics. We hypothesize that endogenous *buc* transcripts are loaded with a repressor prior to nuclear export. Since *cbuc* RNA is not spliced, the repressor is not loaded and *cbuc* transcripts are translated ectopically or prematurely. Alternatively and independently of splicing, a limiting repressor might be overwhelmed by excess *buc* transcripts in transgenic oocytes. Either way, ectopic foci of Buc protein would recruit Bb components and produce the multiple small Bbs observed with DiOC6 and H&E. In *cbuc80* transgenics, we hypothesize that either *cbuc80* transcripts are not recruited or might not be translated as efficiently due to their lack of a 3'UTR. Consequently, local concentrations of Buc protein may not be sufficient to support the development of ectopic Bbs. Based on their smaller size, their perinuclear proximity and the eventual egg polarity defects, we hypothesize that the ectopic Bbs of *cbuc* transgenic oocytes do not reach the cortex, resulting in failure to specify the vegetal pole and a lack of animal-vegetal polarity.

Similar to the germ plasm RNAs that have been examined, patterning molecules, including *wnt8a* and *syntabulin*, localize to the Bb. *syntabulin* is localized by a Buc-dependent pathway. The full exon-intron structure of *syntabulin* is required for its proper localization and activity (Nojima et al., 2010). Like *syntabulin*, *buc* RNA localizes to the Bb (Bontems et al., 2009) and we show that full rescue of the *buc* mutant phenotypes requires the *buc* introns. Notably, incompletely rescued *buc* mutants are ventralized, possibly due to incomplete rescue of dorsal determinant localization in these oocytes. In *Drosophila* oocytes, the exon junction complex (EJC) has been proposed to regulate Gurken (TGF $\alpha$ ) signaling between posterior follicle cells and the oocyte during axis formation, and to mediate *oskar* mRNA localization and translation during germ cell determination (Hachet and Ephrussi, 2001; Micklem et al., 1997; Mohr et al., 2001; Newmark and Boswell, 1994). Our finding that *buc* minigene constructs must have introns to rescue *buc* mutants, together with previous studies of *syntabulin* (Nojima et al., 2010), indicate that the EJC might be involved in Buc-mediated Bb development and transport.

Although it is not clear how RNAs are directed or selected for Bb localization, it is clear for those RNAs that have been examined that early localization to the Bb is prerequisite for their proper localization at later stages of oocyte development (Kosaka et al.,

2007). Transport of RNA to the vegetal pole via the Bb has been proposed to involve an entrapment and expansion mechanism (Chang et al., 2004; Wilk et al., 2005). A self-organizing and amplifying Buc/Balbani complex could facilitate robust recruitment (entrapment) of RNP complexes, including those containing *buc*. Localized translation of *buc* could drive further recruitment of RNPs and expansion of the Bb. Buc might associate with a discrete subset of RNAbps that are capable of forming multiple distinct RNPs. Alternatively, Buc could recruit all Bb-localized RNAs/RNPs, which could then be sorted within the Bb. Either mechanism would be sufficient to recruit the diversity of RNPs that are anticipated to comprise the Bb based on the unique mechanisms (3'UTR versus splicing mediated) that generate distinct and dynamic localization patterns of RNAs, including *buc*, that transit through the Bb in zebrafish.

#### A Buc-mediated feedback amplification mechanism to establish oocyte polarity

Localized Buc protein and its association with RNAbps provides a mechanism to recruit Bb RNAs, including *buc*. Based on the localization of Buc protein and the dominant phenotypes of the *cbuc* transgenes, we hypothesize that an RNAbp could specifically interact with the spliced *buc* mRNA to prevent ectopic translation of *buc*



transcripts. Alternatively, or in addition, a limiting RNAbp might maintain repression of *buc* RNA. It is also possible that Buc accumulates via localized stabilization. Either way, after Buc protein accumulates asymmetrically adjacent to the nucleus, it can interact with its binding partners, such as Rbpms2, which could then recruit their cognate RNAs to form the Bb. Once Buc protein initiates Bb assembly, RNAs are recruited to the Bb by interaction with RNAbps that localize there, including Dazl and Rbpms2 (Kosaka et al., 2007; Song et al., 2007). Some RNAs recruited to the Bb, like *vasa*, may be silenced there [as *Vasa* protein, in contrast to its mRNA, is not a component of the Bb (Knaut et al., 2000)]. However, others, including *buc* and *dazl*, may be translationally activated within the Bb to sustain its development (Bontems et al., 2009; Kosaka et al., 2007). In the case of Buc, this feedback amplification would drive further localized production of Buc protein and expansion of the Bb. The localization and apparent abundance of Buc protein within the Bb, failure to assemble the Bb and recruit *buc* RNA in *buc* mutants (Bontems et al., 2009; Marlow and Mullins, 2008), and the protein- and 3'UTR-dependent dominant phenotypes caused by *cbuc* and *cbuc80* transgenes, are consistent with a Buc-dependent recruitment feedback amplification mechanism acting to establish the initial asymmetry in the oocyte (Fig. 8B,C). In this model, *buc* mRNA is initially present throughout the oocyte, but Buc protein is only translated or stabilized in a small region. Local accumulation of Buc protein establishes the position of the Bb and recruits RNAbps that in turn recruit *buc* and other RNAs to the Bb. Such a feedback mechanism that recruits *buc* mRNA and promotes further accumulation of Buc protein and other RNAs and proteins could establish AnVg polarity and lay the foundation for the later forming embryonic axes.

## MATERIALS AND METHODS

### Antibodies and immunostaining

YenZym (San Francisco, CA, USA) custom antibody service was used to raise rabbit polyclonal antibodies against Buc epitopes: residues 1-15 MEGINNSQPMGVGQ (Y1165 and Y1166) and residues 602-617 KSIHQQRPRSEYNDY (Y1163 and Y1164).

Ovaries were dissected from adults, fixed in 4% paraformaldehyde (PFA), washed in PBS, dehydrated in methanol, rinsed and stained as described (Marlow and Mullins, 2008). Primary Buc antibodies were diluted 1:500. Secondary antibodies (anti-rabbit Alexa Fluor 488 or 546; Molecular Probes) were diluted 1:500. Vectashield (Vector Labs) containing DAPI was used to label the nuclei.

Mitochondria and ER were visualized by staining with DiOC6 [Molecular Probes, D-273; 0.5 µg/ml in PBS+Tween (PBST):dimethyl sulfoxide] at room temperature followed by PBST washes (Marlow and Mullins, 2008). Images were acquired using a Zeiss Axio Observer inverted microscope equipped with Apotome and a CCD camera.

### Plasmid construction, transient assays and transgenesis

The ~2 kb *buc* promoter fragment was amplified from genomic DNA (primers in supplementary material Table S1) and cloned into the Gateway pCR8 entry vector (Invitrogen) and sequenced (Macrogen). Gateway adapters were added using the *buc* 2Kprom attB4 and *buc* prom attB1R primers (supplementary material Table S1) to generate the *p5E-buc* promoter.

The *buc* open reading frame (ORF) was amplified from ovary cDNA using the Invitrogen SuperScript III reverse transcriptase kit with oligo(dT) primers and the primers listed in supplementary material Table S1 to obtain the full-length (*cbuc*) and 3'UTR deletion (*cbuc80*) constructs. The amplified *buc* ORF was cloned into pCR8 and sequenced (Macrogen).

Rescue plasmids were cloned into pCR8 and recombined into pCS2+ derived Gateway destination vectors (Kawakami, 2005; Kawakami, 2007; Kwan et al., 2007; Villefranc et al., 2007) to generate *pTolbuc:bucORFfull3'UTR* (*cbuc*), *pTolbuc:bucORF80bp3'UTR* (*cbuc80*), *pTolbuc:buc<sup>p106</sup>ORF80bpΔ3'UTR* (*cbucp106*) and *buc-intron-exon* (*gbuc*)

clones. Transgenic fish were generated by injecting 25-50 pg plasmid DNA plus 25-50 pg transposase RNA into *buc<sup>p106/+</sup>* heterozygotes.

*pBH-R4/R2* was generated by modifying the 'bleeding heart' Tol2 plasmid (pBH) from *pBH-mcs(multi-cloning site)* (a gift from Michael L. Nonet, Washington University St Louis) to include a Gateway-compatible attR4/attR2 cassette, namely *attR4-chloramphenicol resistance-ccdB survival gene-attR2* from *pTolDestR4R2* (Villefranc et al., 2007).

The *buc* promoter reporter construct was generated in *pBH-R4/R2*. The *p5E-buc* promoter was recombined with pME-mApple (Tol2 kit, v2.0) into *pBH-R4/R2* (Invitrogen). This plasmid was injected (50 pg) along with transposase RNA (25 pg) to generate transgenic lines.

### Genotyping

Genomic DNA was isolated from fin clips. Linked SSLP markers were used to genotype for *buc* (Bontems et al., 2009; Knapik et al., 1998).

### In situ hybridization and histology

Females were anesthetized in Tricaine as described (Westerfield, 1995) and the ovaries were dissected. Whole-mount *in situ* hybridization was performed as described previously (Thisse and Thisse, 1998) except that hybridization was at 65°C and BM purple AP (Roche) was used. *In situ* probes: the *buc* ORF was amplified with the primers listed in supplementary material Table S1 and cloned into pCS2; *vasa* was described previously (Yoon et al., 1997). Images were acquired using an AxioPlan2 or AxioSkop2 microscope equipped with an AxioCam CCD camera (Zeiss) or an Olympus SZ16 fluorescent dissecting microscope and Microfire digital camera (Olympus). Images were processed in ImageJ (NIH), Adobe Photoshop and Adobe Illustrator.

For Hematoxylin and Eosin (H&E) staining, dissected ovaries were fixed in 4% PFA, washed in PBS, dehydrated in methanol, then embedded in paraffin and sectioned. Deparaffinized slides were stained in H&E, coated with Permount solution (Fisher Scientific), coverslipped, and imaged using an AxioSkop2 microscope and AxioCam CCD camera.

Oocytes were staged according to Selman et al. (Selman et al., 1993).

### RT-PCR

Ovaries and other tissues (supplementary material Fig. S1A) were dissected from the specified genotypes. Oocytes were sorted according to Selman et al. (Selman et al., 1993). Trizol (Life Technologies)-extracted RNA was used for oligo(dT) cDNA preparation (using Invitrogen SuperScript III reverse transcriptase) and RT-PCR was performed using the primers listed in supplementary material Table S1.

### Yeast two-hybrid assays

The ProQuest System (Invitrogen) was used for Y2H assays. Baits and preys were prepared from ovary cDNA as described above (for primers see supplementary material Table S1), cloned into pCR8, sequenced, then recombined into pDEST32 or pDEST22 vectors.

### Immunoprecipitation and GST pull-downs

HEK293 cells ( $1 \times 10^6$ ) were transfected with 3 µg pCMV-DshMyc, pCS-YFP-Dgo (Boutros et al., 1998; Jenny et al., 2005) or pCS2-MTRbpms2 or pCS2-GFP-Buc overnight with 3:1 polyethylenimine:DNA. IP was with 1 µg of anti-Myc antibodies (9E10, Santa Cruz) (Jenny et al., 2005). Precipitated proteins were separated by SDS-PAGE, transferred to ImmobilonP (Millipore) and processed for ECL detection (GE Healthcare). Short exposures comprised 1 minute and long exposures 10-15 minutes.

GST proteins were purified as described previously (Jenny et al., 2003). 1 µg DNA was translated using the coupled *in vitro* transcription-translation system (Promega) with  $^{35}\text{S}$ . For GST pull-downs, GST fusion protein (5 µg) was bound to 15 µl GST-Sepharose (Amersham), washed, incubated with  $^{35}\text{S}$ -labeled proteins (5 µl) for 1 hour and analyzed as described (Jenny et al., 2003).

### RNA immunoprecipitation

Ovaries were dissected, snap frozen and stored ( $-80^\circ\text{C}$ ). According to Song et al. (Song et al., 2007), ovaries were homogenized (1 ml YSS buffer) and

centrifuged. The pellet and supernatant were retained. 250 µl of resuspended pellet was pre-cleared with Myc beads (30 µl; Clontech, 631208) for 1 hour at 4°C. Pre-cleared lysate was added to pCS2-MT-protein reticulocyte lysate (45 µl) plus Myc beads (30 µl) and incubated (1 hour at 4°C). Beads were washed (YSS buffer), then incubated in proteinase K lysis buffer (100 µl) and proteinase K (10 µg) (1 hour at 50°C). RNA was isolated using Trizol and precipitated (3 M sodium acetate pH 4.5 in ethanol). Precipitated RNA was used for cDNA synthesis. cDNA (0.5 µg) was used for RT-PCR analysis (primers listed in supplementary material Table S1).

#### Acknowledgements

We are grateful to Lilianna Solnica-Krezel, William S. Talbot and members of the F.L.M. laboratory for discussions and manuscript evaluation. We thank S. Kalinin and C. Depaolo for fish care, and the Einstein Histopathology Core for histology services.

#### Competing interests

The authors declare no competing financial interests.

#### Author contributions

A.E.H., O.H. and F.L.M. performed transgenic construction, phenotypic and molecular analyses. S.R. and A.J. performed Y2H/protein interactions. A.E.H. and E.F. performed RNA IP. All authors discussed data and the manuscript. F.L.M. wrote the manuscript.

#### Funding

This work was supported in part by National Institutes of Health grants RO1GM089979 and start-up funds to F.L.M.; T32-GM007288 to O.H.; and RO1GM088202 to A.J. Deposited in PMC for release after 12 months.

#### Supplementary material

Supplementary material available online at  
http://dev.biologists.org/lookup/suppl/doi:10.1242/dev.090449/-/DC1

#### References

- Abrams, E. W. and Mullins, M. C. (2009). Early zebrafish development: it's in the maternal genes. *Curr. Opin. Genet. Dev.* **19**, 396-403.
- Bontems, F., Stein, A., Marlow, F., Lyautey, J., Gupta, T., Mullins, M. C. and Dosch, R. (2009). Bucky ball organizes germ plasm assembly in zebrafish. *Curr. Biol.* **19**, 414-422.
- Boutros, M., Paricio, N., Strutt, D. I. and Mlodzik, M. (1998). Dishevelled activates JNK and discriminates between JNK pathways in planar polarity and wingless signaling. *Cell* **94**, 109-118.
- Carrera, P., Johnstone, O., Nakamura, A., Casanova, J., Jäckle, H. and Lasko, P. (2000). VASA mediates translation through interaction with a Drosophila yf2 homolog. *Mol. Cell* **5**, 181-187.
- Chang, P., Torres, J., Lewis, R. A., Mowry, K. L., Houliston, E. and King, M. L. (2004). Localization of RNAs to the mitochondrial cloud in Xenopus oocytes through entrapment and association with endoplasmic reticulum. *Mol. Biol. Cell* **15**, 4669-4681.
- Claussen, M. and Pieler, T. (2004). Xvelo1 uses a novel 75-nucleotide signal sequence that drives vegetal localization along the late pathway in Xenopus oocytes. *Dev. Biol.* **266**, 270-284.
- de Smedt, V., Szöllösi, D. and Kloc, M. (2000). The balbiani body: asymmetry in the mammalian oocyte. *Genesis* **26**, 208-212.
- Dosch, R., Wagner, D. S., Mintzer, K. A., Runke, G., Wiemelt, A. P. and Mullins, M. C. (2004). Maternal control of vertebrate development before the midblastula transition: mutants from the zebrafish I. *Dev. Cell* **6**, 771-780.
- Draper, B. W., McCallum, C. M. and Moens, C. B. (2007). nanos1 is required to maintain oocyte production in adult zebrafish. *Dev. Biol.* **305**, 589-598.
- Gagnon, J. A. and Mowry, K. L. (2011). Molecular motors: directing traffic during RNA localization. *Crit. Rev. Biochem. Mol. Biol.* **46**, 229-239.
- Gerber, W. V., Yatskevich, T. A., Antin, P. B., Correia, K. M., Conlon, R. A. and Krieg, P. A. (1999). The RNA-binding protein gene, hermes, is expressed at high levels in the developing heart. *Mech. Dev.* **80**, 77-86.
- Gupta, T., Marlow, F. L., Ferriola, D., Mackiewicz, K., Daprich, J., Monos, D. and Mullins, M. C. (2010). Microtubule actin crosslinking factor 1 regulates Balbiani body function and animal-vegetal polarity of the zebrafish oocyte. *PLoS Genet.* **6**, e1001073.
- Hachet, O. and Ephrussi, A. (2001). Drosophila Y14 shuttles to the posterior of the oocyte and is required for oskar mRNA transport. *Curr. Biol.* **11**, 1666-1674.
- Hashimoto, Y., Maegawa, S., Nagai, T., Yamaha, E., Suzuki, H., Yasuda, K. and Inoue, K. (2004). Localized maternal factors are required for zebrafish germ cell formation. *Dev. Biol.* **268**, 152-161.
- Holt, C. E. and Bullock, S. L. (2009). Subcellular mRNA localization in animal cells and why it matters. *Science* **326**, 1212-1216.
- Houston, D. W. and King, M. L. (2000). A critical role for Xdazl, a germ plasm-localized RNA, in the differentiation of primordial germ cells in Xenopus. *Development* **127**, 447-456.
- Houston, D. W., Zhang, J., Maines, J. Z., Wasserman, S. A. and King, M. L. (1998). A Xenopus DAZ-like gene encodes an RNA component of germ plasm and is a functional homologue of Drosophila boule. *Development* **125**, 171-180.
- Jenny, A., Darken, R. S., Wilson, P. A. and Mlodzik, M. (2003). Prickle and Strabismus form a functional complex to generate a correct axis during planar cell polarity signaling. *EMBO J.* **22**, 4409-4420.
- Jenny, A., Reynolds-Kenneally, J., Das, G., Burnett, M. and Mlodzik, M. (2005). Diego and Prickle regulate Frizzled planar cell polarity signalling by competing for Dishevelled binding. *Nat. Cell Biol.* **7**, 691-697.
- Kawakami, K. (2005). Transposon tools and methods in zebrafish. *Dev. Dyn.* **234**, 244-254.
- Kawakami, K. (2007). Tol2: a versatile gene transfer vector in vertebrates. *Genome Biol.* **8** Suppl 1, S7.
- Kloc, M. and Etkin, L. D. (1995). Two distinct pathways for the localization of RNAs at the vegetal cortex in Xenopus oocytes. *Development* **121**, 287-297.
- Kloc, M. and Etkin, L. D. (2005). RNA localization mechanisms in oocytes. *J. Cell Sci.* **118**, 269-282.
- Kloc, M., Larabell, C., Chan, A. P. and Etkin, L. D. (1998). Contribution of METRO pathway localized molecules to the organization of the germ cell lineage. *Mech. Dev.* **75**, 81-93.
- Kloc, M., Bilinski, S., Pui-Yee Chan, A. and Etkin, L. D. (2000). The targeting of Xcat2 mRNA to the germinal granules depends on a cis-acting germinal granule localization element within the 3'UTR. *Dev. Biol.* **217**, 221-229.
- Kloc, M., Bilinski, S., Chan, A. P., Allen, L. H., Zearfoss, N. R. and Etkin, L. D. (2001). RNA localization and germ cell determination in Xenopus. *Int. Rev. Cytol.* **203**, 63-91.
- Kloc, M., Bilinski, S. and Etkin, L. D. (2004). The Balbiani body and germ cell determinants: 150 years later. *Curr. Top. Dev. Biol.* **59**, 1-36.
- Knapik, E. W., Goodman, A., Ekker, M., Chevrete, M., Delgado, J., Neuhauss, S., Shimoda, N., Driever, W., Fishman, M. C. and Jacob, H. J. (1998). A microsatellite genetic linkage map for zebrafish (Danio rerio). *Nat. Genet.* **18**, 338-343.
- Knaut, H., Pelegri, F., Bohmann, K., Schwarz, H. and Nüsslein-Volhard, C. (2000). Zebrafish vasa RNA but not its protein is a component of the germ plasm and segregates asymmetrically before germline specification. *J. Cell Biol.* **149**, 875-888.
- Kosaka, K., Kawakami, K., Sakamoto, H. and Inoue, K. (2007). Spatiotemporal localization of germ plasm RNAs during zebrafish oogenesis. *Mech. Dev.* **124**, 279-289.
- Kroll, T. T., Zhao, W. M., Jiang, C. and Huber, P. W. (2002). A homolog of FBP2/KSRP binds to localized mRNAs in Xenopus oocytes. *Development* **129**, 5609-5619.
- Kugler, J. M. and Lasko, P. (2009). Localization, anchoring and translational control of oskar, gurken, bicoid and nanos mRNA during Drosophila oogenesis. *Fly (Austin)* **3**, 15-28.
- Kurihara, Y., Watanabe, H., Kawaguchi, A., Hori, T., Mishiro, K., Ono, M., Sawada, H. and Uesugi, S. (2004). Dynamic changes in intranuclear and subcellular localizations of mouse Prp/DAZAP1 during spermatogenesis: the necessity of the C-terminal proline-rich region for nuclear import and localization. *Arch. Histol. Cytol.* **67**, 325-333.
- Kwan, K. M., Fujimoto, E., Grabher, C., Mangum, B. D., Hardy, M. E., Campbell, D. S., Parant, J. M., Yost, H. J., Kanki, J. P. and Chien, C. B. (2007). The Tol2kit: a multisite gateway-based construction kit for Tol2 transposon transgenesis constructs. *Dev. Dyn.* **236**, 3088-3099.
- Lasko, P. F. and Ashburner, M. (1988). The product of the Drosophila gene vasa is very similar to eukaryotic initiation factor-4A. *Nature* **335**, 611-617.
- Lu, F. I., Thisse, C. and Thisse, B. (2011). Identification and mechanism of regulation of the zebrafish dorsal determinant. *Proc. Natl. Acad. Sci. USA* **108**, 15876-15880.
- Maegawa, S., Yasuda, K. and Inoue, K. (1999). Maternal mRNA localization of zebrafish DAZ-like gene. *Mech. Dev.* **81**, 223-226.
- Markussen, F. H., Michon, A. M., Breitwieser, W. and Ephrussi, A. (1995). Translational control of oskar generates short OSK, the isoform that induces pole plasma assembly. *Development* **121**, 3723-3732.
- Marlow, F. L. (2010). *Maternal Control of Development in Vertebrates: My Mother Made Me Do It!* San Rafael, CA: Morgan & Claypool Life Sciences.
- Marlow, F. L. and Mullins, M. C. (2008). Bucky ball functions in Balbiani body assembly and animal-vegetal polarity in the oocyte and follicle cell layer in zebrafish. *Dev. Biol.* **321**, 40-50.
- McNeilly, J. R., Saunders, P. T., Taggart, M., Cranfield, M., Cooke, H. J. and McNeilly, A. S. (2000). Loss of oocytes in Dazl knockout mice results in maintained ovarian steroidogenic function but altered gonadotropin secretion in adult animals. *Endocrinology* **141**, 4284-4294.
- Micklem, D. R., Dasgupta, R., Elliott, H., Gergely, F., Davidson, C., Brand, A., Gonzalez-Reyes, A. and St Johnston, D. (1997). The mago nashi gene is required for the polarisation of the oocyte and the formation of perpendicular axes in Drosophila. *Curr. Biol.* **7**, 468-478.
- Minakhina, S. and Steward, R. (2005). Axes formation and RNA localization. *Curr. Opin. Genet. Dev.* **15**, 416-421.
- Mir, A. and Heasman, J. (2008). How the mother can help: studying maternal Wnt signaling by anti-sense-mediated depletion of maternal mRNAs and the host transfer technique. *Methods Mol. Biol.* **469**, 417-429.
- Mohr, S. E., Dillon, S. T. and Boswell, R. E. (2001). The RNA-binding protein Tsunagi interacts with Mago Nashi to establish polarity and localize oskar mRNA during Drosophila oogenesis. *Genes Dev.* **15**, 2886-2899.
- Mowry, K. L. and Melton, D. A. (1992). Vegetal messenger RNA localization directed by a 340-nt RNA sequence element in Xenopus oocytes. *Science* **255**, 991-994.



- Newmark, P. A. and Boswell, R. E. (1994). The mago nashi locus encodes an essential product required for germ plasm assembly in *Drosophila*. *Development* **120**, 1303-1313.
- Nojima, H., Rothhämel, S., Shimizu, T., Kim, C. H., Yonemura, S., Marlow, F. L. and Hibi, M. (2010). Syntabulin, a motor protein linker, controls dorsal determination. *Development* **137**, 923-933.
- Pepling, M. E., Wilhelm, J. E., O'Hara, A. L., Gephardt, G. W. and Spradling, A. C. (2007). Mouse oocytes within germ cell cysts and primordial follicles contain a Balbiani body. *Proc. Natl. Acad. Sci. USA* **104**, 187-192.
- Ruggiu, M., Speed, R., Taggart, M., McKay, S. J., Kilanowski, F., Saunders, P., Dorin, J. and Cooke, H. J. (1997). The mouse *Dazl* gene encodes a cytoplasmic protein essential for gametogenesis. *Nature* **389**, 73-77.
- Saunders, P. T., Turner, J. M., Ruggiu, M., Taggart, M., Burgoyne, P. S., Elliott, D. and Cooke, H. J. (2003). Absence of *mDazl* produces a final block on germ cell development at meiosis. *Reproduction* **126**, 589-597.
- Schier, A. F. and Talbot, W. S. (2005). Molecular genetics of axis formation in zebrafish. *Annu. Rev. Genet.* **39**, 561-613.
- Selman, K., Wallace, R., Sarka, A. and Qi, X. (1993). Stages of oocyte development in the zebrafish, *Brachydanio rerio*. *J. Morphol.* **218**, 203-224.
- Song, H. W., Cauffman, K., Chan, A. P., Zhou, Y., King, M. L., Etkin, L. D. and Kloc, M. (2007). Hermes RNA-binding protein targets RNAs-encoding proteins involved in meiotic maturation, early cleavage, and germline development. *Differentiation* **75**, 519-528.
- St Johnston, D. (2005). Moving messages: the intracellular localization of mRNAs. *Nat. Rev. Mol. Cell Biol.* **6**, 363-375.
- Styhler, S., Nakamura, A., Swan, A., Suter, B. and Lasko, P. (1998). *vasa* is required for GURKEN accumulation in the oocyte, and is involved in oocyte differentiation and germline cyst development. *Development* **125**, 1569-1578.
- Takeda, Y., Mishima, Y., Fujiwara, T., Sakamoto, H. and Inoue, K. (2009). *DAZL* relieves miRNA-mediated repression of germline mRNAs by controlling poly(A) tail length in zebrafish. *PLoS ONE* **4**, e7513.
- Thisse, C. and Thisse, B. (1998). High resolution whole-mount in situ hybridization. In *The Zebrafish Book* (ed. M. Westerfield). Eugene, OR: University of Oregon Press.
- Villefranc, J. A., Amigo, J. and Lawson, N. D. (2007). Gateway compatible vectors for analysis of gene function in the zebrafish. *Dev. Dyn.* **236**, 3077-3087.
- Westerfield, M. (1995). *The Zebrafish Book*. Eugene, OR: University of Oregon Press.
- Wilk, K., Bilinski, S., Dougherty, M. T. and Kloc, M. (2005). Delivery of germinal granules and localized RNAs via the messenger transport organizer pathway to the vegetal cortex of *Xenopus* oocytes occurs through directional expansion of the mitochondrial cloud. *Int. J. Dev. Biol.* **49**, 17-21.
- Yoon, C., Kawakami, K. and Hopkins, N. (1997). Zebrafish *vasa* homologue RNA is localized to the cleavage planes of 2- and 4-cell-stage embryos and is expressed in the primordial germ cells. *Development* **124**, 3157-3165.
- Zearfoss, N. R., Chan, A. P., Wu, C. F., Kloc, M. and Etkin, L. D. (2004). Hermes is a localized factor regulating cleavage of vegetal blastomeres in *Xenopus laevis*. *Dev. Biol.* **267**, 60-71.
- Zhao, W. M., Jiang, C., Kroll, T. T. and Huber, P. W. (2001). A proline-rich protein binds to the localization element of *Xenopus* Vg1 mRNA and to ligands involved in actin polymerization. *EMBO J.* **20**, 2315-2325.
- Zhou, Y. and King, M. L. (2004). Sending RNAs into the future: RNA localization and germ cell fate. *IUBMB Life* **56**, 19-27.
- Zimyanin, V., Lowe, N. and St Johnston, D. (2007). An oskar-dependent positive feedback loop maintains the polarity of the *Drosophila* oocyte. *Curr. Biol.* **17**, 353-359.
